# Supplementary material
Source: PubMed Central journal article supplement (PMC5394321)
Supplement: AEM.00243-17_zam999117793s1.pdf [file AEM.00243-17_zam999117793s1.pdf]

## SUPPLEMENTAL MATERIAL

**Table S1** The number of sequences and OTUs from each sample in the dataset.

| Sampling                      | Sample         | Number of sequences and OTUs in each sample |                |
|-------------------------------|----------------|---------------------------------------------|----------------|
|                               |                | Number of sequences                         | Number of OTUs |
| S1                            | Filter.0.2um.A | 220295                                      | 852            |
|                               | Filter.0.2um.B | 165079                                      | 1076           |
|                               | Filter.0.2um.C | 86853                                       | 1122           |
|                               | Filter.5um.A   | 251406                                      | 2997           |
|                               | Filter.5um.B   | 363554                                      | 3076           |
|                               | MBA.10C.10w.A  | 102657                                      | 372            |
|                               | MBA.10C.10w.B  | 53969                                       | 240            |
|                               | MBA.10C.10w.C  | 106918                                      | 226            |
|                               | MBA.25.5w.B    | 119813                                      | 297            |
|                               | MBA.25C.5w.A   | 108321                                      | 157            |
|                               | MBA.25C.5w.C   | 136518                                      | 152            |
|                               | MBG.10C.10w.A  | 302303                                      | 1493           |
|                               | MBG.10C.10w.B  | 144939                                      | 830            |
|                               | MBG.10C.10w.C  | 172083                                      | 148            |
|                               | MBG.25C.5w.A   | 36590                                       | 98             |
|                               | MBG.25C.5w.B   | 183976                                      | 237            |
|                               | MBG.25C.5w.C   | 211098                                      | 189            |
|                               | SWA.10C.10w.A  | 79051                                       | 111            |
|                               | SWA.10C.10w.B  | 91203                                       | 202            |
|                               | SWA.10C.10w.C  | 96301                                       | 59             |
|                               | SWA.25C.5w.A   | 95666                                       | 82             |
|                               | SWA.25C.5w.B   | 8791                                        | 83             |
|                               | SWA.25C.5w.C   | 187820                                      | 71             |
|                               | SWG.10C.10w.A  | 65216                                       | 151            |
|                               | SWG.10C.10w.B  | 67144                                       | 162            |
|                               | SWG.10C.10w.C  | 115029                                      | 194            |
|                               | SWG.25C.5w.A   | 687394                                      | 425            |
|                               | SWG.25C.5w.B   | 180930                                      | 229            |
|                               | SWG.25C.5w.C   | 199525                                      | 852            |
|                               | S2             | Filter.0.2um.A                              | 138337         |
| Filter.0.2um.B                |                | 113220                                      | 944            |
| Filter.0.2um.C <sup>a</sup>   |                | 3813                                        | 208            |
| Filter.5um.A                  |                | 225494                                      | 1057           |
| Filter.5um.B                  |                | 291596                                      | 1280           |
| MBA.0.5.10C.5w.A <sup>b</sup> |                | 45862                                       | 77             |
| MBA.0.5.10C.5w.B <sup>b</sup> |                | 54884                                       | 94             |

|                               |        |     |
|-------------------------------|--------|-----|
| MBA.0.5.10C.5w.C <sup>b</sup> | 110085 | 173 |
| MBA.0.5.25C.2w.A <sup>b</sup> | 21065  | 46  |
| MBA.0.5.25C.2w.B <sup>b</sup> | 26655  | 59  |
| MBA.0.5.25C.2w.C <sup>b</sup> | 151989 | 102 |
| MBA.10C.10w.A                 | 75313  | 114 |
| MBA.10C.10w.B                 | 320221 | 55  |
| MBA.10C.10w.C                 | 40700  | 61  |
| MBA.10C.5w.A                  | 93617  | 277 |
| MBA.10C.5w.B                  | 127045 | 80  |
| MBA.10C.5w.C                  | 114783 | 128 |
| MBA.25.2w.A                   | 160553 | 246 |
| MBA.25C.2w.B                  | 207982 | 164 |
| MBA.25C.2w.C                  | 192807 | 201 |
| MBA.25C.5w.A                  | 82020  | 63  |
| MBA.25C.5w.B                  | 93446  | 77  |
| MBA.25C.5w.C                  | 61493  | 61  |
| MBA.50.10C.5w.A <sup>c</sup>  | 41791  | 92  |
| MBA.50.10C.5w.B <sup>c</sup>  | 17682  | 72  |
| MBA.50.10C.5w.C <sup>c</sup>  | 84869  | 130 |
| MBA.50.25C.2w.A <sup>c</sup>  | 19261  | 62  |
| MBA.50.25C.2w.B <sup>c</sup>  | 49606  | 91  |
| MBA.50.25C.2w.C <sup>c</sup>  | 110176 | 184 |
| MBG.10C.5w.A                  | 510041 | 471 |
| MBG.10C.5w.B <sup>a</sup>     | 4801   | 59  |
| MBG.10C.5w.C                  | 151464 | 130 |
| MBG.10C.10w.A                 | 46633  | 43  |
| MBG.10C.10w.B                 | 184191 | 59  |
| MBG.10C.10w.C                 | 56434  | 49  |
| MBG.25C.2w.A                  | 177643 | 348 |
| MBG.25C.2w.B                  | 82369  | 169 |
| MBG.25C.2w.C                  | 105949 | 227 |
| MBG.25C.5w.A                  | 169192 | 46  |
| MBG.25C.5w.B                  | 52877  | 49  |
| MBG.25C.5w.C                  | 63316  | 49  |
| SWA.0.5.10C.5w.A <sup>b</sup> | 73126  | 134 |
| SWA.0.5.10C.5w.B <sup>b</sup> | 74161  | 170 |
| SWA.0.5.10C.5w.C <sup>b</sup> | 94583  | 281 |
| SWA.0.5.25C.2w.A <sup>b</sup> | 37458  | 56  |
| SWA.0.5.25C.2w.B <sup>b</sup> | 113836 | 138 |
| SWA.0.5.25C.2w.C <sup>b</sup> | 134027 | 111 |
| SWA.10C.10w.A                 | 158612 | 130 |
| SWA.10C.10w.B                 | 60867  | 78  |
| SWA.10C.10w.C                 | 253819 | 82  |
| SWA.10C.5w.A                  | 123741 | 235 |

|                              |        |     |
|------------------------------|--------|-----|
| SWA.10C.5w.B                 | 127184 | 251 |
| SWA.10C.5w.C                 | 117251 | 446 |
| SWA.25C.2w.A                 | 215608 | 181 |
| SWA.25C.2w.B                 | 128752 | 238 |
| SWA.25C.2w.C                 | 141008 | 398 |
| SWA.25C.5w.A                 | 92017  | 109 |
| SWA.25C.5w.B                 | 106022 | 112 |
| SWA.25C.5w.C                 | 54175  | 65  |
| SWA.50.10C.5w.A <sup>c</sup> | 60425  | 74  |
| SWA.50.10C.5w.B <sup>c</sup> | 108097 | 72  |
| SWA.50.10C.5w.C <sup>c</sup> | 101780 | 58  |
| SWA.50.25C.2w.A <sup>c</sup> | 43389  | 54  |
| SWA.50.25C.2w.B <sup>c</sup> | 135259 | 110 |
| SWA.50.25C.2w.C <sup>c</sup> | 102638 | 85  |
| SWG.10C.10w.A                | 213337 | 88  |
| SWG.10C.10w.B                | 201466 | 68  |
| SWG.10C.10w.C                | 119261 | 112 |
| SWG.10C.5w.A                 | 161499 | 267 |
| SWG.10C.5w.B                 | 183605 | 329 |
| SWG.10C.5w.C                 | 119067 | 253 |
| SWG.25C.2w.A                 | 278480 | 139 |
| SWG.25C.2w.B                 | 146178 | 190 |
| SWG.25C.2w.C                 | 169674 | 757 |
| SWG.25C.5w.A                 | 155510 | 153 |
| SWG.25C.5w.B                 | 42587  | 91  |
| SWG.25C.5w.C                 | 56308  | 60  |

<sup>a</sup> These samples were excluded from the subsequent sequence analyses due to the subsampling cutoff of 8,500 sequences.

<sup>b</sup> Plates supplemented with 0.5  $\mu$ M AHLs

<sup>c</sup> Plates supplemented with 50  $\mu$ M AHLs

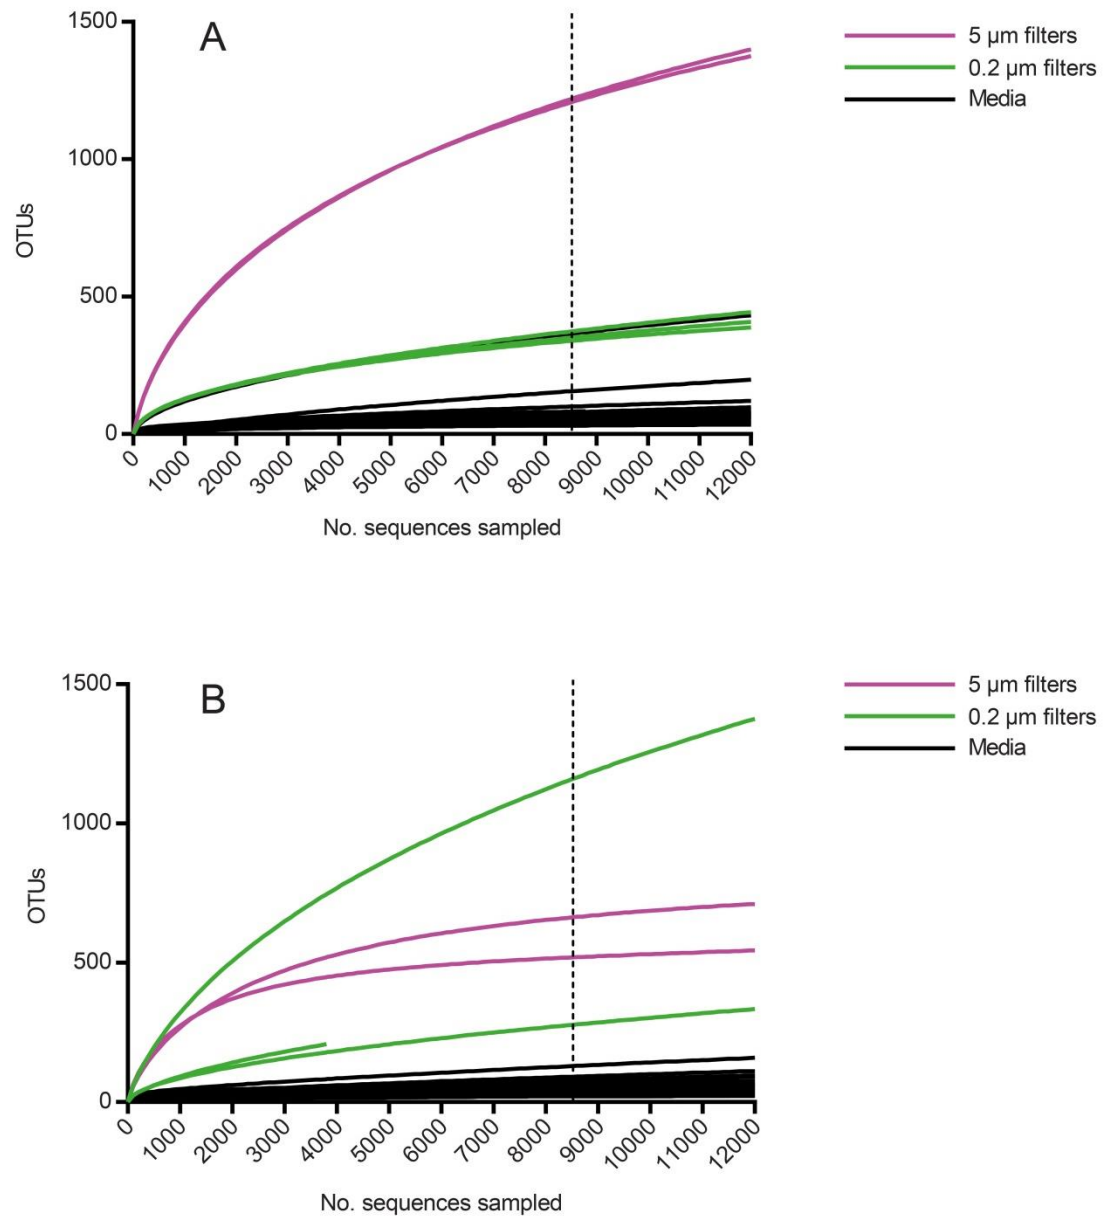

**FIGURE S1** Rarefaction curves from all sequenced samples from sampling 1 (A) and sampling 2 (B). Sequences were clustered at a 97 % sequence similarity. In the subsequent diversity analyses 8,500 sequences from each sample were analyzed as indicated by the dashed line.

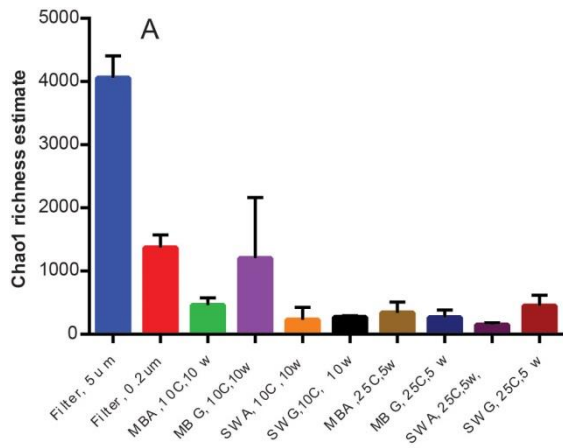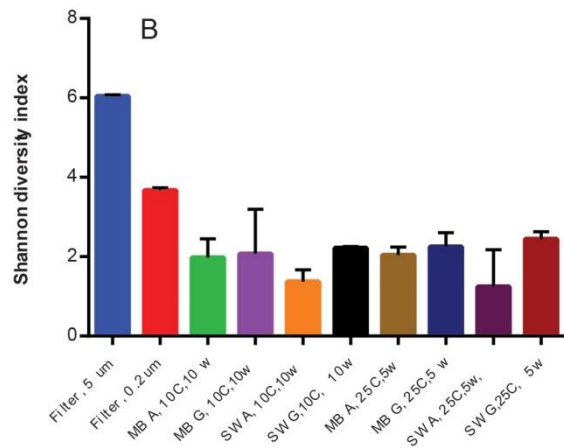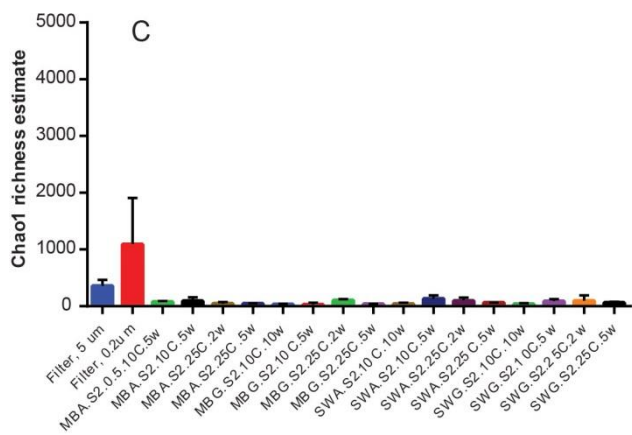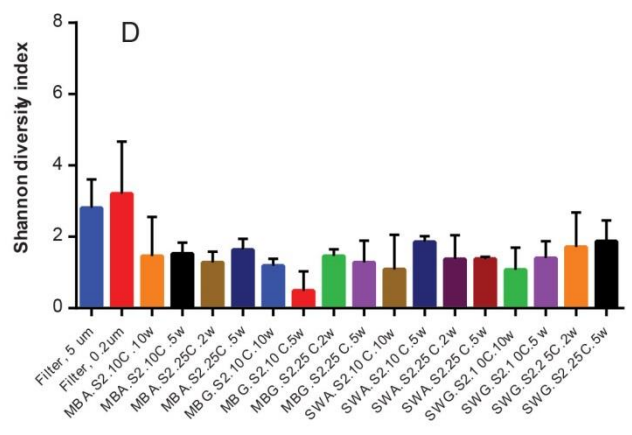

**FIGURE S2** Measures of alpha-diversity in the two data sets. The Chao1 richness estimates for sampling 1 and 2 are shown in panels A and C, respectively, and the Shannon diversity index values are shown in panels B and D for sampling 1 and 2, respectively.

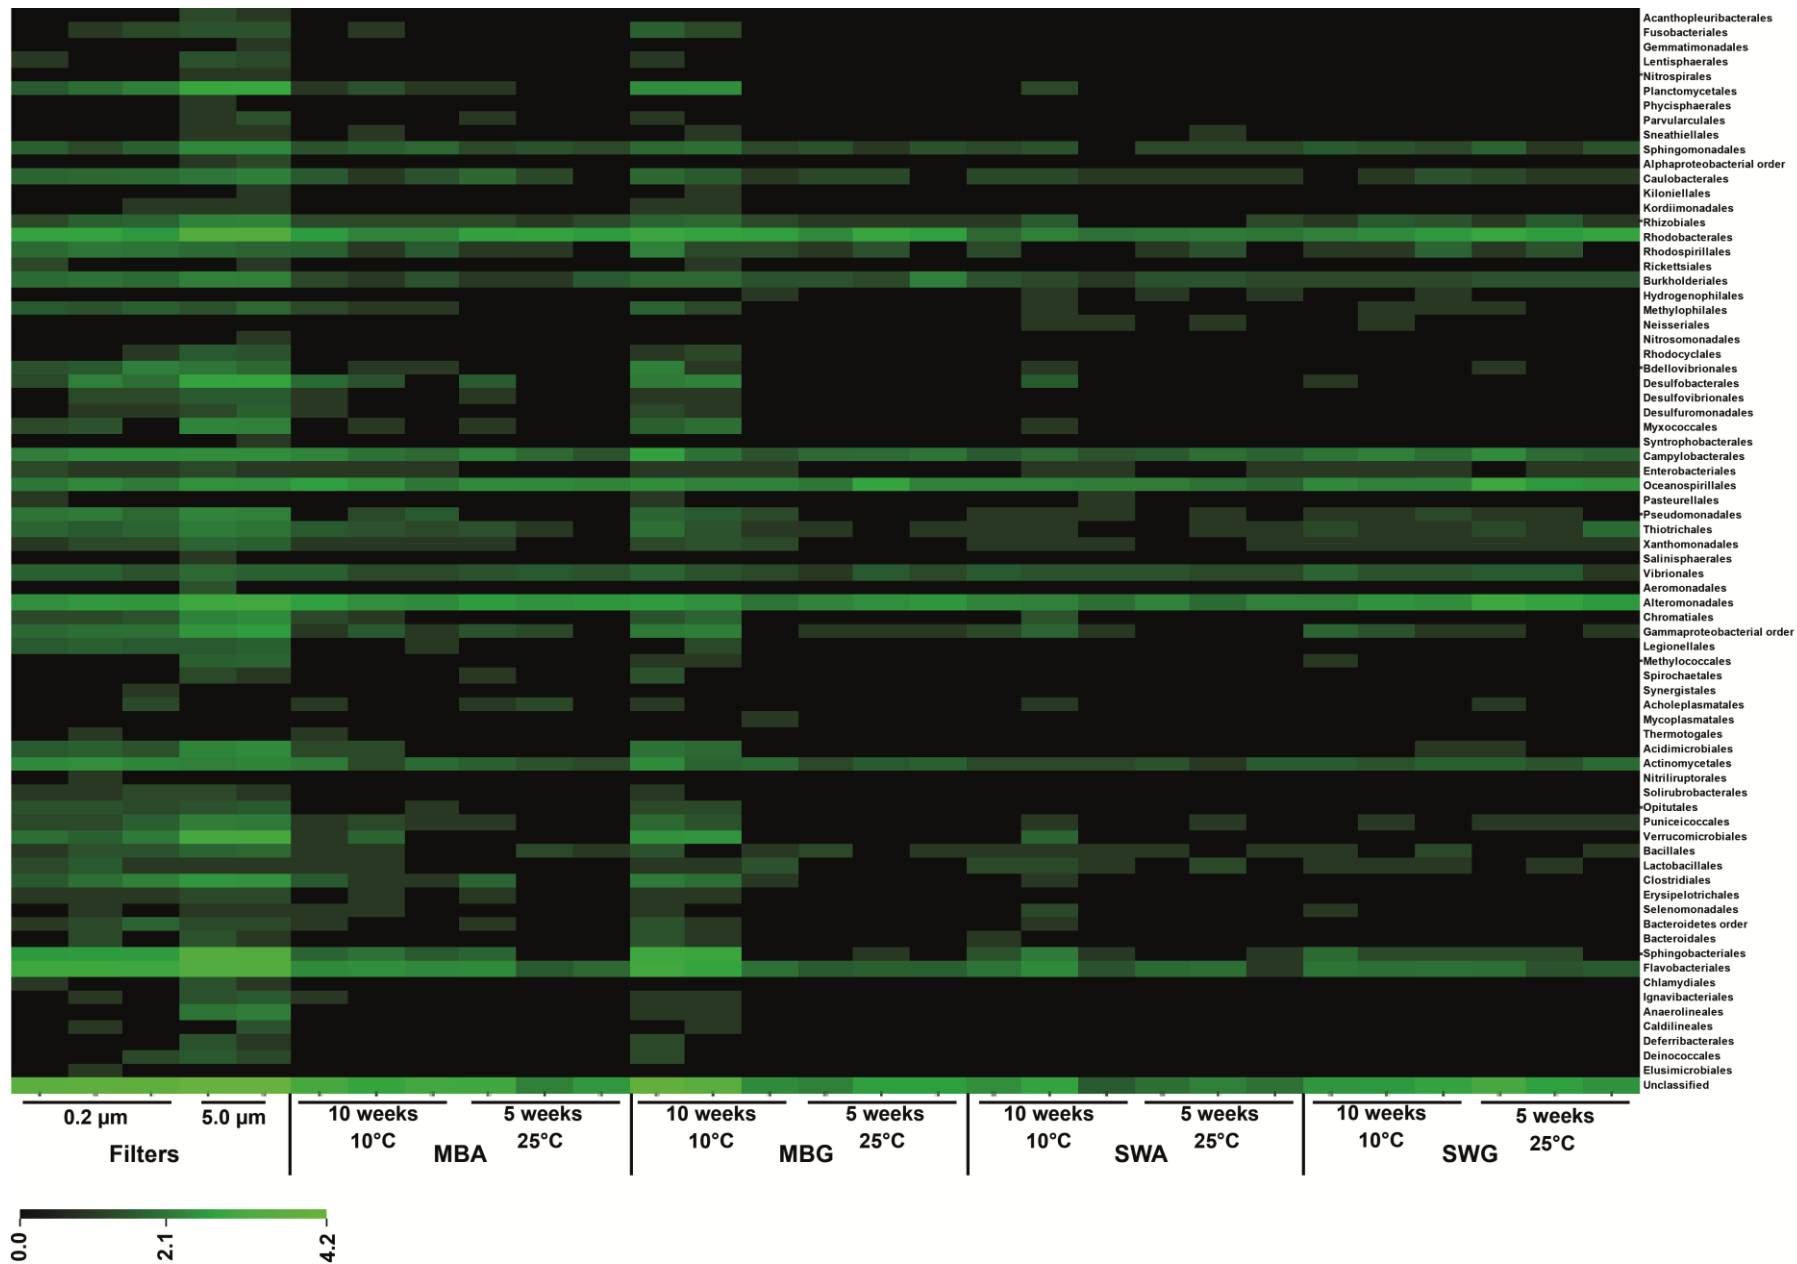

**FIGURE S3** Heatmap displaying the relative OTU richness across samples in S1. The scale bar represents  $\log_{10}+1$  transformed OTU richness.

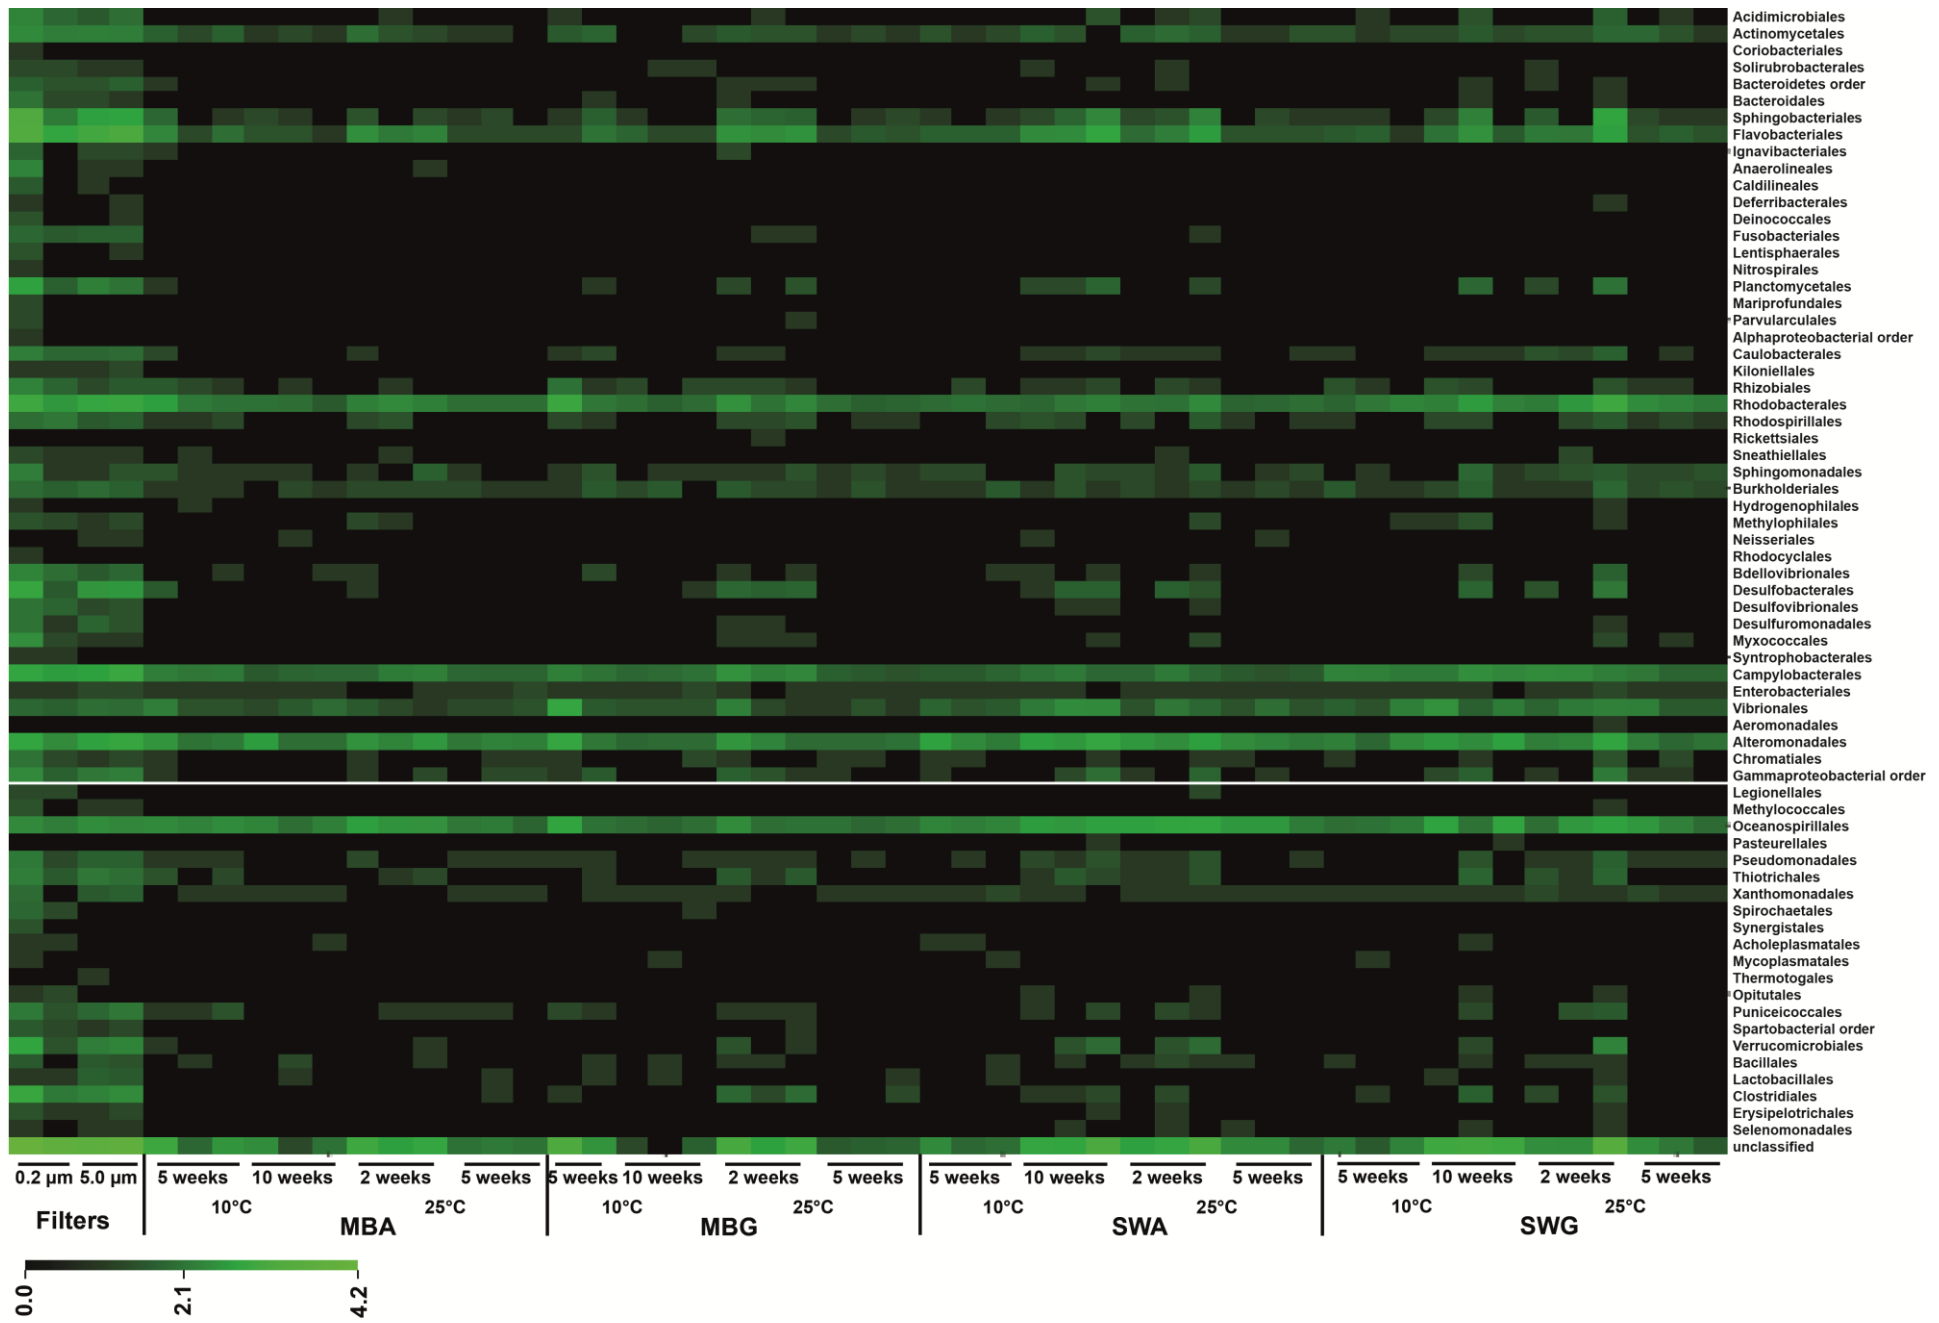

**FIGURE S4** Heatmap displaying the relative OTU richness across samples in S2. The scale bar represents  $\log_{10}+1$  transformed OTU richness.

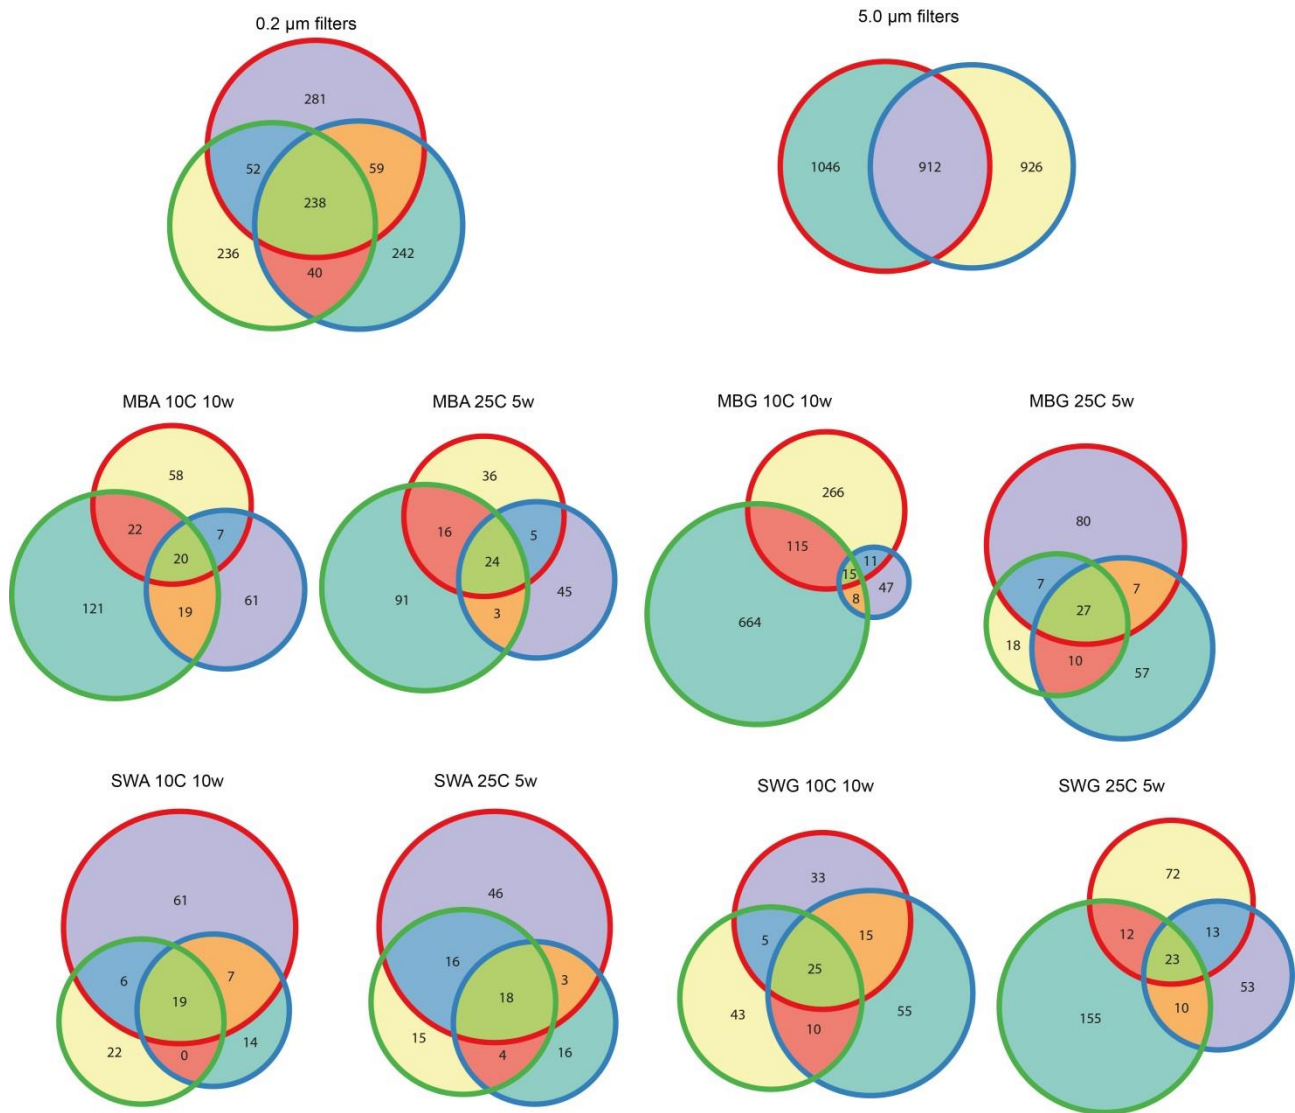

**FIGURE S5** Weighted Venn diagrams showing the number of OTUs shared between replicates within each treatment during S1. Diagrams are only weighted within treatments.



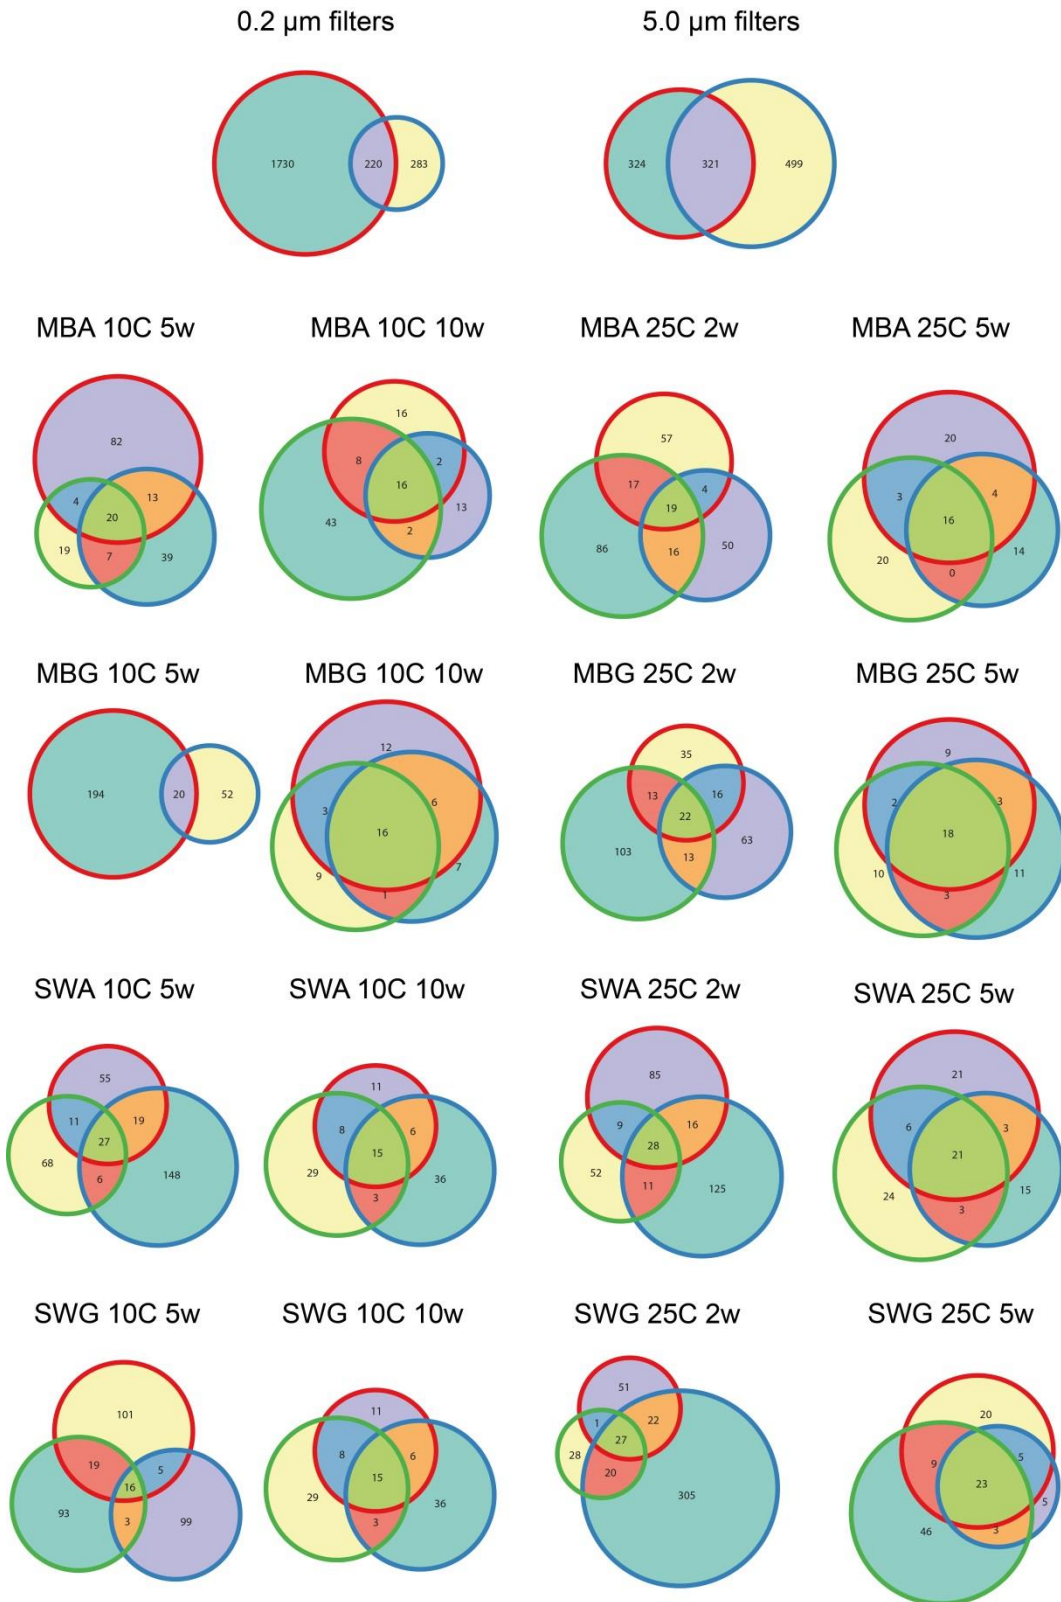

**FIGURE S6** Weighted Venn diagrams showing the number of OTUs shared between replicates within each treatment during S2, excluding communities from plates supplemented with AHLs. Diagrams are only weighted within treatments.

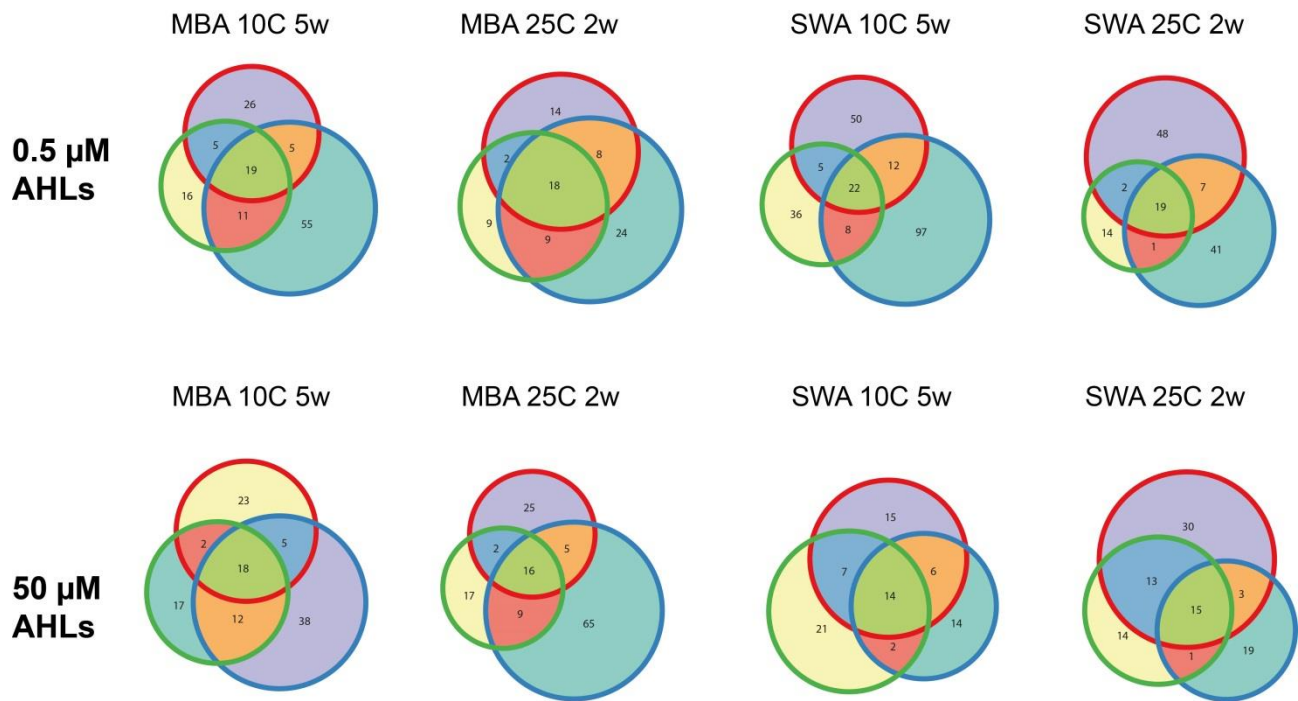

**FIGURE S7** Venn diagrams showing the number of OTUs shared between replicates within each of the AHL-supplemented treatments during S2. Diagrams are only weighted within treatments.
